# Supplementary material for: Frequency and Characterization of Antimicrobial Resistance and Virulence Genes of Coagulase-Negative Staphylococci from Wild Birds in Spain. Detection of tst-Carrying S. sciuri Isolates
Source: PubMed Central journal article supplement (PMC7564563; doi:10.3390/microorganisms8091317), 2020-08-29
Supplement: microorganisms-08-01317-s001.pdf [file microorganisms-08-01317-s001.pdf]

**Frequency and Characterization of Antimicrobial Resistance and Virulence Genes of Coagulase-Negative Staphylococci from Wild Birds in Spain. Detection of *tst*-carrying *S. sciuri* Isolates.**

Laura Ruiz-Ripa, Paula Gómez, Carla Andrea Alonso, María Cruz Camacho, Yolanda Ramiro, Javier de la Puente, Rosa Fernández-Fernández, Miguel Ángel Quevedo, Juan Manuel Blanco, Gerardo Báguena, Myriam Zarazaga, Ursula Höfle, Carmen Torres\*

**Table S1.** Primer pairs used for the characterization of CoNS recovered from wild birds.

| Target gene                | Primer Sequence (5'-3')                                        | Amplicon size (bp) | Reference |
|----------------------------|----------------------------------------------------------------|--------------------|-----------|
| <i>optrA</i>               | F: AGGTGGTCAGCGAACTAA<br>R: ATCA ACTGTTCCCATTCA                | 1395               | [1]       |
| <i>poxA</i>                | F: TCAATGCAGAGCAGGAAGCA<br>R: GGTGGATTTACCGACACCGT             | 791                | [2]       |
| <i>cfr</i>                 | F: TGAAGTATAAAGCAGGTT GGGAGTCA<br>R: ACCATATAATTGACCACA AGCAGC | 746                | [3]       |
| <i>cfr(B)</i>              | F: TGAGCATATACGAGTAACCTCAAGA<br>R: CGCAAGCAGCGTCTATATCA        | 293                | [4]       |
| <i>cfr(D)</i>              | F: AGAAGTCGCAACAAGTGAGGA<br>R: GCAACTGCATGAGTCAAAGAA           | 595                | [5]       |
| <i>fexA</i>                | F: GTACTTGTAGGTGCAATTACGGCTGA<br>R: CGCATCTGAGTAGGACATAGCGTC   | 1272               | [6]       |
| <i>fexB</i>                | F: TTCCCACTATTGGTGAAAGGAT<br>R: GCAATTCCTTTTATGGACGTT          | 816                | [7]       |
| <i>cat<sub>pC194</sub></i> | F: CGACTTTTAGTATAACCACAGA<br>R: GCCAGTCATTAGGCCTAT             | 579                | [8]       |
| <i>cat<sub>pC221</sub></i> | F: ATTTATGCAATTATGGAAGTTG<br>R: TGAAGCATGGTAACCATCAC           | 434                |           |

|                             |                                                         |     |      |
|-----------------------------|---------------------------------------------------------|-----|------|
| <i>cat</i> <sub>pC223</sub> | F: GAATCAAATGCTAGTTTTAACTC<br>R: ACATGGTAACCATCACATAC   | 283 |      |
| <i>bla</i> <sub>Z</sub>     | F: CAGTTCACATGCCAAAGAG<br>R: TACTCTTGCGGTTTC            | 772 | [8]  |
| <i>mecA</i>                 | F: GGGATCATAGCGTCATTATTC<br>R: AACGATTGTGACACGATAGCC    | 527 | [9]  |
| <i>mecB</i>                 | F: TTAACATATACACCCGCTTG<br>R: TAAAGTTCATTAGGCACCTCC     | 527 | [10] |
| <i>mecC</i>                 | F: GTCCTAATGCTAATGCA<br>R: TAAGCAATAATGACTACC           | 304 | [11] |
| <i>erm(A)</i>               | F: TCTAAAAAGCATGTAAAAGAA<br>R: CTTCGATAGTTTATTAATATTAG  | 645 |      |
| <i>erm(B)</i>               | F: GAAAAGTACTCAACCAAATA<br>R: AGTAACGGTACTTAAATTGTTTA   | 639 | [12] |
| <i>erm(C)</i>               | F: TCAAAACATAATATAGATAAA<br>R: GCAAATATTGTTTAAATCGTCAAT | 642 |      |
| <i>erm(T)</i>               | F: CCGCCATTGAAATAGATCCT<br>R: TTCTGTAGCTGTGCTTTCAAAAA   | 200 | [13] |
| <i>erm(43)</i>              | F: TACAGC AGATGATAACATTG<br>R: GTTGTTTCGATATTTTA TTTAAG | 609 | [14] |
| <i>msr(A)</i>               | F: GGCACAATAAGAGTGTTTAA AGG                             | 399 | [15] |

|                               |                                                                          |      |      |
|-------------------------------|--------------------------------------------------------------------------|------|------|
|                               | R: AAGTTATATCATGAATAGATTGTCCTGTT                                         |      |      |
| <i>mph(C)</i>                 | F: ATGACTCGACATAATGAAAT<br>R: CTACTCTTTCATACCTAACTC                      | 900  | [8]  |
| <i>sal(A)</i>                 | F: CTATTAATCGATGAACCAACAAACC<br>R: TTGATTTACCTGTACCATTTCTGC              | 610  | [16] |
| <i>lnu(A)</i>                 | F: GGTGGCTGGGGGGTAGATGTATTA ACTGG<br>R: GCTTCTTTTGAAATACATGGTATTTTTCGATC | 322  | [17] |
| <i>lnu(B)</i>                 | F: CCTACCTATTGTTTGTGGAA<br>R: ATAACGTTACTCTCCTATTC                       | 944  | [18] |
| <i>lsa(B)</i>                 | F: TGCCGAAGCCATGTACCGTCC<br>R: CGGTTAGACCAACCAGCCGAACG                   | 396  | [13] |
| <i>vga(A)</i>                 | F: AGTGGTGGTGAAGTAACACG<br>R: GGTTCAATACTCAATCGACTGAG                    | 1264 | [19] |
| <i>aac(6')-Ie-aph(2'')-Ia</i> | F: CCAAGAGCAATAAGGGCATA<br>R: CACTATCATAACCACTACCG                       | 220  | [20] |
| <i>ant(6)-Ia</i>              | F: ACTGGCTTAATCAATTTGGG<br>R: GCCTTTCCGCCACCTCACCG                       | 597  | [21] |
| <i>str</i>                    | F: TATTGCTCTCGAGGGTTC<br>R: CTTTCTATATCCATTCATCTC                        | 646  | [8]  |
| <i>ant(4')-Ia</i>             | F: GCAAGGACCGACAACATTTTC<br>R: TGGCACAGATGGTCATAACC                      | 165  | [20] |

|                           |                                                                 |     |      |
|---------------------------|-----------------------------------------------------------------|-----|------|
| <i>tet(K)</i>             | F: TTAGGTGAAGGGTTAGGTCC<br>R: GCAAACCTCATTCCAGAAGCA             | 697 |      |
| <i>tet(L)</i>             | F: CATTGGTCTTATTGGATCG<br>R: ATTACACTCCGATTTCCG                 | 456 | [22] |
| <i>tet(M)</i>             | F: GTTAAATAGTGTTCTTGGAG<br>R: CTAAGATATGGCTCTAACAA              | 576 |      |
| <i>fusB</i>               | F: CTATAATGATATTAATGAGATTTTTGG<br>R: TTTTACATATTGACCATCCGAATTGG | 431 | [23] |
| <i>fusC</i>               | F: TTAAAGAAAAAGATATTGATATCTCGG<br>R: TTACAGAATCCTTTTACTTTATTGG  | 332 |      |
| <i>fusD</i>               | F: AATTCGGTCAACGATCCC<br>R: TTTTACATATTGACCATCCGAATTGG          | 431 | [24] |
| <i>dfrA</i>               | F: CCTGGCACTTACCAAATG<br>R: CTGAAGATTGACTTCCC                   | 374 | [8]  |
| <i>dfrD</i>               | F: TTCTTTAATTGTTGCGATGG<br>R: TTAACGAATTCTCTCATATATG            | 582 |      |
| <i>dfrG</i>               | F: TCGGAAGAGCCTTACCTGACAGAA<br>R: CCCTTTTTGGGCAAATACCTCATTCCA   | 323 | [13] |
| <i>dfrK</i>               | F: GAGAATCCCAGAGGATTGGG<br>R: CAAGAAGCTTTTCGCTCATAAA            | 423 |      |
| <b>Amino acid changes</b> |                                                                 |     |      |

|                                 |                                                            |      |      |
|---------------------------------|------------------------------------------------------------|------|------|
| <b>GyrA</b>                     | F: ATGAGYGTTATCGTKCWCCTGC<br>R: CCATWGARCCAAAGTTACCTTG     | 261  |      |
| <b>GrlA</b>                     | F: AATACRYAYGATAARAATTTCCG<br>R: GTYGTRTCATCATAGTTTGG      | 289  | [25] |
| <b>SCC<sub>mec</sub>-typing</b> |                                                            |      |      |
| <i>ccrA1-ccrB</i>               | F: AACCTATATCATCAATCAGTACGT<br>R: ATTGCCTTGATAATAGCCITCT   | 695  |      |
| <i>ccrA2-ccrB</i>               | F: TAAAGGCATCAATGCACAAACACT<br>R: ATTGCCTTGATAATAGCCITCT   | 937  |      |
| <i>ccrA3-ccrB</i>               | F: AGCTCAAAGCAAGCAATAGAAT<br>R: ATTGCCTTGATAATAGCCITCT     | 1791 | [26] |
| <i>ccrA4-ccrB4</i>              | F: TTGAATGCCCTCCATGAATAAAAT<br>R: AGAAAAGATAGAAGTTCGAAAGA  | 1287 |      |
| <i>ccrC</i>                     | F: CACTTAATCCATGTACACAG<br>R: TTAGGAAATCTTGATGGCAA         | 336  | [27] |
| <i>mecA-mecI</i>                | F: CATAACTTCCCATCTGCAGATG<br>R: ATATACCAAACCCGACA ACTACA   | 1963 |      |
| <i>mecA-IS1272</i>              | F: ATGCTTAATGATAGCATCCGAATG<br>R: ATATACCAAACCCGACA ACTACA | 2827 | [26] |
| <i>mecA-IS431</i>               | F: TGAGGTTATTCAGATATTTGATGT<br>R: ATATACCAAACCCGACA ACTACA | 804  |      |

| <b>Virulence genes</b>              |                                                                       |      |      |
|-------------------------------------|-----------------------------------------------------------------------|------|------|
| <i>lukS/F-PV</i>                    | F: ATCATTAGGTAAAATGTCTGGACATGATCCA<br>R: GCATCAAGTGTATTGGATAGCAAAGC   | 443  | [17] |
| <i>tst</i>                          | F: TTCACTATTTGTAAAAGTGTGACACCCACT<br>R: TACTAATGAATTTTTTATCGTAAGCCCTT | 180  |      |
| <i>eta</i>                          | F: ACTGTAGGAGCTAGTGCATTTGT<br>R: TGGATACTTTTGTCTATCTTTTTCATCAAC       | 616  | [28] |
| <i>etb</i>                          | F: CAGATAAAGAGCTTTATACACACATTAC<br>R: AGTGAACTTATCTTTCTATTGAAAAACTC   | 1553 |      |
| <i>etd</i>                          | F: AACTATCATGTATCAAGG<br>R: CAGAATTTCCCGACTCAG                        | 402  | [29] |
| <b>Immune Evasion Cluster (IEC)</b> |                                                                       |      |      |
| <i>scn</i>                          | F: AGCACAAGCTTGCCAACATCG<br>R: TTAATATTACTTTTTAGTGC                   | 257  | [30] |

**Table S2.** Antimicrobial resistance phenotype and genotype, and virulence gene content of the 173 CoNS recovered from free-ranging birds.

| Isolate | Species          | Origin   | Sampling year | Antimicrobial resistance phenotype <sup>a</sup> | Antimicrobial resistance genotype | Virulence gene content |
|---------|------------------|----------|---------------|-------------------------------------------------|-----------------------------------|------------------------|
| C9166   | <i>S. sciuri</i> | Magpie   | 2015          | PEN-FOX-CLI <sup>I</sup> -FUS                   | <i>mecA, sal(A)</i>               | -                      |
| C9167   | <i>S. sciuri</i> | Magpie   | 2015          | CLI-TET-FUS                                     | <i>lnu(A), sal(A), tet(K)</i>     | -                      |
| C9174   | <i>S. sciuri</i> | Red kite | 2016          | CLI <sup>I</sup>                                | <i>sal(A)</i>                     | -                      |
| C9175   | <i>S. sciuri</i> | Red kite | 2016          | CLI <sup>I</sup>                                | <i>lnu(A), sal(A)</i>             | -                      |
| C9177   | <i>S. sciuri</i> | Red kite | 2016          | CLI-FUS                                         | <i>lnu(A), sal(A)</i>             | -                      |
| C9179   | <i>S. sciuri</i> | Red kite | 2016          | CLI <sup>I</sup>                                | <i>sal(A)</i>                     | -                      |
| C9181   | <i>S. sciuri</i> | Red kite | 2016          | CLI-FUS                                         | <i>sal(A)</i>                     | -                      |
| C9183   | <i>S. sciuri</i> | Red kite | 2016          | CLI <sup>I</sup>                                | <i>sal(A)</i>                     | -                      |
| C9185   | <i>S. sciuri</i> | Red kite | 2016          | CLI-FUS                                         | <i>sal(A)</i>                     | -                      |
| C9186   | <i>S. sciuri</i> | Red kite | 2016          | PEN-FOX-CLI-FUS                                 | <i>mecA, sal(A)</i>               | -                      |
| C9188   | <i>S. sciuri</i> | Red kite | 2016          | CLI <sup>I</sup>                                | <i>lnu(A), sal(A)</i>             | -                      |
| C9191   | <i>S. sciuri</i> | Red kite | 2016          | CLI <sup>I</sup>                                | <i>sal(A)</i>                     | -                      |
| C9193   | <i>S. sciuri</i> | Red kite | 2016          | CLI-FUS                                         | <i>lnu(A), sal(A)</i>             | -                      |
| C9194   | <i>S. sciuri</i> | Red kite | 2016          | CLI-FUS                                         | <i>lnu(A), sal(A)</i>             | -                      |
| C9197   | <i>S. sciuri</i> | Red kite | 2016          | CLI-TET-FUS                                     | <i>sal(A), tet(K)</i>             | -                      |
| C9198   | <i>S. sciuri</i> | Red kite | 2016          | PEN-FOX-CLI-TET-FUS                             | <i>mecA, sal(A), tet(K)</i>       | -                      |

|              |                  |                   |      |                               |                                                  |   |
|--------------|------------------|-------------------|------|-------------------------------|--------------------------------------------------|---|
| <b>C9200</b> | <i>S. sciuri</i> | Red kite          | 2016 | CLI-TET-FUS                   | <i>lnu(A), sal(A), tet(K), tet(M)</i>            | - |
| <b>C9202</b> | <i>S. sciuri</i> | Red kite          | 2016 | CLI-FUS                       | <i>lnu(A), sal(A)</i>                            | - |
| <b>C9203</b> | <i>S. sciuri</i> | Red kite          | 2016 | CLI <sup>I</sup>              | <i>sal(A)</i>                                    | - |
| <b>C9206</b> | <i>S. sciuri</i> | Red kite          | 2015 | CLI <sup>I</sup> -FUS         | <i>sal(A)</i>                                    | - |
| <b>C9207</b> | <i>S. sciuri</i> | Red kite          | 2015 | PEN-FOX-CLI <sup>I</sup> -FUS | <i>mecA, sal(A)</i>                              | - |
| <b>C9208</b> | <i>S. sciuri</i> | Red kite          | 2015 | CLI-FUS                       | <i>lnu(A), sal(A)</i>                            | - |
| <b>C9211</b> | <i>S. sciuri</i> | Red kite          | 2015 | ERY-CLI-FUS                   | <i>erm(C), sal(A)</i>                            | - |
| <b>C9212</b> | <i>S. sciuri</i> | Red kite          | 2015 | PEN-FOX-CLI <sup>I</sup> -FUS | <i>mecA, sal(A)</i>                              | - |
| <b>C9213</b> | <i>S. sciuri</i> | Red kite          | 2015 | CLI <sup>I</sup> -FUS         | <i>sal(A)</i>                                    | - |
| <b>C9214</b> | <i>S. sciuri</i> | Red kite          | 2015 | CLI-FUS                       | <i>sal(A)</i>                                    | - |
| <b>C9215</b> | <i>S. sciuri</i> | Red kite          | 2015 | PEN-FOX-CLI <sup>I</sup> -FUS | <i>mecA, sal(A)</i>                              | - |
| <b>C9216</b> | <i>S. sciuri</i> | Black-headed gull | 2015 | CLI <sup>I</sup> -FUS         | <i>sal(A)</i>                                    | - |
| <b>C9217</b> | <i>S. sciuri</i> | Black-headed gull | 2015 | PEN-FOX-CLI <sup>I</sup> -FUS | <i>mecA, sal(A)</i>                              | - |
| <b>C9218</b> | <i>S. sciuri</i> | Black-headed gull | 2015 | PEN-CLI-FUS                   | <i>blaZ, sal(A)</i>                              | - |
| <b>C9219</b> | <i>S. sciuri</i> | Black-headed gull | 2015 | PEN-ERY-CLI <sup>I</sup> -FUS | <i>erm(C), lnu(A), sal(A)</i>                    | - |
| <b>C9220</b> | <i>S. sciuri</i> | Black-headed gull | 2015 | PEN-FOX-CLI-FUS               | <i>mecA, sal(A)</i>                              | - |
| <b>C9222</b> | <i>S. sciuri</i> | Cinereous vulture | 2015 | PEN-FOX-ERY-CLI-STR-TET-FUS   | <i>mecA, erm(B), lnu(A), sal(A), str, tet(M)</i> | - |
| <b>C9223</b> | <i>S. sciuri</i> | Cinereous vulture | 2015 | CLI-FUS                       | <i>sal(A)</i>                                    | - |
| <b>C9224</b> | <i>S. sciuri</i> | Cinereous vulture | 2015 | PEN-CLI-FUS                   | <i>lnu(A), sal(A)</i>                            | - |

|              |                  |                   |      |                               |                               |   |
|--------------|------------------|-------------------|------|-------------------------------|-------------------------------|---|
| <b>C9225</b> | <i>S. sciuri</i> | Cinereous vulture | 2015 | PEN-CLI-FUS                   | <i>sal(A)</i>                 | - |
| <b>C9226</b> | <i>S. sciuri</i> | Cinereous vulture | 2015 | PEN-CLI-FUS                   | <i>blaZ, sal(A)</i>           | - |
| <b>C9227</b> | <i>S. sciuri</i> | Cinereous vulture | 2015 | PEN-FOX-CLI-FUS               | <i>mecA, sal(A)</i>           | - |
| <b>C9229</b> | <i>S. sciuri</i> | Cinereous vulture | 2015 | PEN-CLI-FUS                   | <i>sal(A)</i>                 | - |
| <b>C9230</b> | <i>S. sciuri</i> | Cinereous vulture | 2015 | PEN-CLI-CHL-FUS               | <i>lnu(A), sal(A), fexA</i>   | - |
| <b>C9231</b> | <i>S. sciuri</i> | Cinereous vulture | 2015 | CLI-FUS                       | <i>sal(A)</i>                 | - |
| <b>C9232</b> | <i>S. sciuri</i> | Cinereous vulture | 2015 | PEN-CLI-FUS                   | <i>sal(A)</i>                 | - |
| <b>C9233</b> | <i>S. sciuri</i> | Cinereous vulture | 2015 | PEN-FOX-CLI <sup>I</sup> -FUS | <i>mecA, sal(A)</i>           | - |
| <b>C9234</b> | <i>S. sciuri</i> | Cinereous vulture | 2015 | PEN-CLI-STR-FUS               | <i>sal(A), str</i>            | - |
| <b>C9235</b> | <i>S. sciuri</i> | Cinereous vulture | 2015 | PEN-CLI-FUS                   | <i>sal(A)</i>                 | - |
| <b>C9236</b> | <i>S. sciuri</i> | Cinereous vulture | 2015 | PEN-CLI-CHL-FUS               | <i>sal(A), fexA</i>           | - |
| <b>C9238</b> | <i>S. sciuri</i> | Cinereous vulture | 2015 | PEN-FOX-CLI-FUS               | <i>mecA, sal(A)</i>           | - |
| <b>C9239</b> | <i>S. sciuri</i> | Cinereous vulture | 2015 | CLI <sup>I</sup> -FUS         | <i>sal(A)</i>                 | - |
| <b>C9240</b> | <i>S. sciuri</i> | Cinereous vulture | 2015 | PEN-FOX-CLI <sup>I</sup> -FUS | <i>mecA, sal(A)</i>           | - |
| <b>C9244</b> | <i>S. sciuri</i> | Cinereous vulture | 2015 | PEN-FOX-CLI <sup>I</sup> -FUS | <i>mecA, sal(A)</i>           | - |
| <b>C9245</b> | <i>S. sciuri</i> | Cinereous vulture | 2015 | CLI <sup>I</sup> -FUS         | <i>sal(A)</i>                 | - |
| <b>C9246</b> | <i>S. sciuri</i> | Cinereous vulture | 2015 | CLI <sup>I</sup> -FUS         | <i>lnu(A), sal(A)</i>         | - |
| <b>C9248</b> | <i>S. sciuri</i> | Cinereous vulture | 2015 | PEN-CLI-FUS                   | <i>sal(A)</i>                 | - |
| <b>C9249</b> | <i>S. sciuri</i> | Cinereous vulture | 2015 | PEN-FOX-CLI-STR-FUS           | <i>mecA, sal(A), str</i>      | - |
| <b>C9252</b> | <i>S. sciuri</i> | Cinereous vulture | 2015 | PEN-CLI <sup>I</sup> -FUS     | <i>sal(A)</i>                 | - |
| <b>C9256</b> | <i>S. sciuri</i> | Cinereous vulture | 2015 | ERY-CLI-FUS                   | <i>erm(B), erm(C), sal(A)</i> | - |

|              |                  |                       |      |                           |                                           |   |
|--------------|------------------|-----------------------|------|---------------------------|-------------------------------------------|---|
| <b>C9258</b> | <i>S. sciuri</i> | Cinereous vulture     | 2015 | ERY-CLI-TOB-CIP-FUS       | <i>erm(B), msr(A), sal(A), ant(4')-Ia</i> | - |
| <b>C9260</b> | <i>S. sciuri</i> | Cinereous vulture     | 2015 | PEN-FOX-CLI-FUS           | <i>mecA, sal(A)</i>                       | - |
| <b>C9262</b> | <i>S. sciuri</i> | Cinereous vulture     | 2015 | ERY-CLI <sup>I</sup> -FUS | <i>erm(C), sal(A)</i>                     | - |
| <b>C9263</b> | <i>S. sciuri</i> | Cinereous vulture     | 2015 | PEN-FOX-CLI-TOB-FUS       | <i>mecA, blaZ, sal(A), ant(4')-Ia</i>     | - |
| <b>C9264</b> | <i>S. sciuri</i> | Cinereous vulture     | 2015 | CLI <sup>I</sup> -FUS     | <i>sal(A)</i>                             | - |
| <b>C9266</b> | <i>S. sciuri</i> | Bearded vulture       | 2015 | PEN-CLI <sup>I</sup> -FUS | <i>sal(A)</i>                             | - |
| <b>C9270</b> | <i>S. sciuri</i> | Bearded vulture       | 2016 | PEN-FOX-CLI-FUS           | <i>mecA, sal(A)</i>                       | - |
| <b>C9274</b> | <i>S. sciuri</i> | Western marsh harrier | 2016 | CLI <sup>I</sup>          | <i>sal(A)</i>                             | - |
| <b>C9462</b> | <i>S. sciuri</i> | Magpie                | 2016 | PEN-FOX-CLI-STR-FUS       | <i>mecA, sal(A), str</i>                  | - |
| <b>C9464</b> | <i>S. sciuri</i> | Magpie                | 2016 | PEN-ERY-CLI-FUS           | <i>erm(B), erm(C), sal(A)</i>             | - |
| <b>C9465</b> | <i>S. sciuri</i> | Magpie                | 2016 | CLI-FUS                   | <i>lnu(A), sal(A)</i>                     | - |
| <b>C9466</b> | <i>S. sciuri</i> | Magpie                | 2016 | PEN-CLI-FUS               | <i>blaZ, lnu(A), sal(A)</i>               | - |
| <b>C9467</b> | <i>S. sciuri</i> | Magpie                | 2016 | PEN-CLI-GEN-TOB-FUS       | <i>sal(A), aac(6')-Ie-aph(2')-Ia</i>      | - |
| <b>C9468</b> | <i>S. sciuri</i> | Magpie                | 2016 | CLI <sup>I</sup> -FUS     | <i>sal(A)</i>                             | - |
| <b>C9470</b> | <i>S. sciuri</i> | Magpie                | 2016 | CLI <sup>I</sup> -FUS     | <i>sal(A)</i>                             | - |
| <b>C9471</b> | <i>S. sciuri</i> | Magpie                | 2016 | CLI-FUS                   | <i>sal(A)</i>                             | - |
| <b>C9472</b> | <i>S. sciuri</i> | Magpie                | 2016 | CLI <sup>I</sup> -FUS     | <i>sal(A)</i>                             | - |
| <b>C9473</b> | <i>S. sciuri</i> | Magpie                | 2016 | CLI <sup>I</sup> -FUS     | <i>sal(A)</i>                             | - |
| <b>C9474</b> | <i>S. sciuri</i> | Magpie                | 2016 | PEN-CLI <sup>I</sup> -FUS | <i>sal(A)</i>                             | - |

|              |                  |                   |      |                     |                                     |            |
|--------------|------------------|-------------------|------|---------------------|-------------------------------------|------------|
| <b>C9475</b> | <i>S. sciuri</i> | Magpie            | 2016 | PEN-CLI-FUS         | <i>blaZ, sal(A)</i>                 | -          |
| <b>C9476</b> | <i>S. sciuri</i> | Magpie            | 2016 | PEN-FOX-ERY-CLI-FUS | <i>mecA, erm(C), lnu(A), sal(A)</i> | -          |
| <b>C9477</b> | <i>S. sciuri</i> | Magpie            | 2016 | PEN-FOX-CLI-STR-FUS | <i>mecA, sal(A), str</i>            | -          |
| <b>C9478</b> | <i>S. sciuri</i> | Cinereous vulture | 2016 | CLI-FUS             | <i>sal(A)</i>                       | -          |
| <b>C9479</b> | <i>S. sciuri</i> | Cinereous vulture | 2016 | ERY-CLI-STR-FUS     | <i>erm(B), sal(A), str</i>          | -          |
| <b>C9480</b> | <i>S. sciuri</i> | Cinereous vulture | 2016 | CLI-STR-FUS         | <i>sal(A), str</i>                  | -          |
| <b>C9481</b> | <i>S. sciuri</i> | Cinereous vulture | 2016 | PEN-CLI-FUS         | <i>sal(A)</i>                       | -          |
| <b>C9483</b> | <i>S. sciuri</i> | Cinereous vulture | 2016 | CLI-FUS             | <i>sal(A)</i>                       | -          |
| <b>C9484</b> | <i>S. sciuri</i> | Cinereous vulture | 2016 | CLI-STR-TET-FUS     | <i>lnu(A), sal(A), str, tet(L)</i>  | -          |
| <b>C9487</b> | <i>S. sciuri</i> | Cinereous vulture | 2016 | CLI-FUS             | <i>lnu(A), sal(A)</i>               | -          |
| <b>C9488</b> | <i>S. sciuri</i> | Cinereous vulture | 2016 | CLI-FUS             | <i>lnu(A), sal(A)</i>               | -          |
| <b>C9489</b> | <i>S. sciuri</i> | Cinereous vulture | 2016 | CLI-FUS             | <i>sal(A)</i>                       | -          |
| <b>C9491</b> | <i>S. sciuri</i> | Cinereous vulture | 2016 | PEN-CLI-FUS         | <i>sal(A)</i>                       | -          |
| <b>C9493</b> | <i>S. sciuri</i> | Cinereous vulture | 2016 | PEN-CLI-FUS         | <i>blaZ, sal(A)</i>                 | -          |
| <b>C9494</b> | <i>S. sciuri</i> | Cinereous vulture | 2016 | PEN-CLI-FUS         | <i>sal(A)</i>                       | -          |
| <b>C9497</b> | <i>S. sciuri</i> | Cinereous vulture | 2016 | CLI-FUS             | <i>sal(A)</i>                       | -          |
| <b>C9498</b> | <i>S. sciuri</i> | Cinereous vulture | 2016 | CLI-FUS             | <i>sal(A)</i>                       | -          |
| <b>C9499</b> | <i>S. sciuri</i> | Cinereous vulture | 2016 | PEN-ERY-CLI-FUS     | <i>erm(C), sal(A)</i>               | -          |
| <b>C9501</b> | <i>S. sciuri</i> | Cinereous vulture | 2016 | CLI-FUS             | <i>sal(A)</i>                       | <i>tst</i> |
| <b>C9502</b> | <i>S. sciuri</i> | Cinereous vulture | 2016 | CLI-TET-FUS         | <i>sal(A), tet(K)</i>               | -          |

|              |                  |                    |      |                                   |                                               |            |
|--------------|------------------|--------------------|------|-----------------------------------|-----------------------------------------------|------------|
| <b>C9503</b> | <i>S. sciuri</i> | Cinereous vulture  | 2016 | PEN-ERY-CLI-FUS                   | <i>erm(C), sal(A)</i>                         | <i>tst</i> |
| <b>C9505</b> | <i>S. sciuri</i> | Cinereous vulture  | 2016 | CLI-GEN-TOB-FUS                   | <i>lsa(B), sal(A), aac(6')-Ie-aph(2'')-Ia</i> | -          |
| <b>C9506</b> | <i>S. sciuri</i> | Cinereous vulture  | 2016 | PEN-FOX-CLI <sup>I</sup> -TOB-FUS | <i>mecA, sal(A), ant(4')-Ia</i>               | -          |
| <b>C9509</b> | <i>S. sciuri</i> | Cinereous vulture  | 2016 | PEN-CLI-FUS                       | <i>sal(A)</i>                                 | -          |
| <b>C9512</b> | <i>S. sciuri</i> | Cinereous vulture  | 2016 | CLI <sup>I</sup> -FUS             | <i>sal(A)</i>                                 | -          |
| <b>C9513</b> | <i>S. sciuri</i> | Cinereous vulture  | 2016 | CLI <sup>I</sup>                  | <i>mecA, sal(A)</i>                           | -          |
| <b>C9514</b> | <i>S. sciuri</i> | Cinereous vulture  | 2016 | CLI <sup>I</sup> -GEN-TOB-FUS     | <i>sal(A), aac(6')-Ie-aph(2'')-Ia,</i>        | -          |
| <b>C9515</b> | <i>S. sciuri</i> | Cinereous vulture  | 2016 | PEN-FOX-CLI <sup>I</sup> -STR-FUS | <i>mecA, sal(A), str</i>                      | -          |
| <b>C9516</b> | <i>S. sciuri</i> | Cinereous vulture  | 2016 | CLI-FUS                           | <i>sal(A)</i>                                 | -          |
| <b>C9517</b> | <i>S. sciuri</i> | Northern bald ibis | 2016 | CLI <sup>I</sup> -FUS             | <i>mecA, sal(A)</i>                           | -          |
| <b>C9518</b> | <i>S. sciuri</i> | Northern bald ibis | 2016 | PEN-CLI-FUS                       | <i>blaZ, sal(A)</i>                           | -          |
| <b>C9519</b> | <i>S. sciuri</i> | Northern bald ibis | 2016 | PEN-FOX-CLI <sup>I</sup> -FUS     | <i>mecA, sal(A)</i>                           | -          |
| <b>C9520</b> | <i>S. sciuri</i> | Northern bald ibis | 2016 | PEN-FOX-CLI-FUS                   | <i>mecA, sal(A)</i>                           | -          |
| <b>C9521</b> | <i>S. sciuri</i> | Northern bald ibis | 2016 | PEN-FOX-CLI <sup>I</sup> -FUS     | <i>mecA, sal(A)</i>                           | -          |
| <b>C9522</b> | <i>S. sciuri</i> | Northern bald ibis | 2016 | PEN-FOX-CLI-FUS                   | <i>mecA, sal(A)</i>                           | -          |
| <b>C9523</b> | <i>S. sciuri</i> | Northern bald ibis | 2016 | CLI <sup>I</sup> -FUS             | <i>sal(A)</i>                                 | -          |
| <b>C9525</b> | <i>S. sciuri</i> | Northern bald ibis | 2016 | PEN-FOX-CLI-FUS                   | <i>mecA, sal(A)</i>                           | -          |
| <b>C9526</b> | <i>S. sciuri</i> | Northern bald ibis | 2016 | CLI <sup>I</sup> -FUS             | <i>sal(A)</i>                                 | -          |
| <b>C9527</b> | <i>S. sciuri</i> | Northern bald ibis | 2016 | PEN-CLI <sup>I</sup> -TET-FUS     | <i>sal(A), tet(K)</i>                         | -          |

|              |                  |                        |      |                                               |                                                      |   |
|--------------|------------------|------------------------|------|-----------------------------------------------|------------------------------------------------------|---|
| <b>C9528</b> | <i>S. sciuri</i> | Northern bald ibis     | 2016 | CLI <sup>l</sup> -FUS                         | <i>mecA, sal(A)</i>                                  | - |
| <b>C9529</b> | <i>S. sciuri</i> | Egyptian vulture       | 2016 | CLI                                           | <i>sal(A)</i>                                        | - |
| <b>C9530</b> | <i>S. sciuri</i> | Egyptian vulture       | 2016 | CLI-FUS                                       | <i>sal(A)</i>                                        | - |
| <b>C9533</b> | <i>S. sciuri</i> | European honey buzzard | 2016 | CLI-FUS                                       | <i>sal(A)</i>                                        | - |
| <b>C9173</b> | <i>S. lentus</i> | Red kite               | 2016 | ERY-CLI <sup>ln</sup> -TET-FUS                | <i>erm(B), erm(43), mph(C), lnu(A), tet(M)</i>       | - |
| <b>C9176</b> | <i>S. lentus</i> | Red kite               | 2016 | CLI-FUS                                       | <i>lnu(A), lsa(B)</i>                                | - |
| <b>C9180</b> | <i>S. lentus</i> | Red kite               | 2016 | PEN-FOX-ERY-CLI-TET-CIP <sup>b</sup> -FUS     | <i>mecA, erm(B), erm(43), mph(C), vga(A), tet(M)</i> | - |
| <b>C9182</b> | <i>S. lentus</i> | Red kite               | 2016 | PEN-FOX-ERY-CLI-STR-TET-CIP <sup>b</sup> -FUS | <i>mecA, erm(B), erm(43), mph(C), str, tet(M)</i>    | - |
| <b>C9184</b> | <i>S. lentus</i> | Red kite               | 2016 | CLI-TET-FUS                                   | <i>lnu(A), tet(K)</i>                                | - |
| <b>C9187</b> | <i>S. lentus</i> | Red kite               | 2016 | CLI-STR-TET-FUS                               | <i>lnu(A), vga(A), str, tet(K)</i>                   | - |
| <b>C9189</b> | <i>S. lentus</i> | Red kite               | 2016 | PEN-ERY-CLI-FUS                               | <i>blaZ, erm(C)</i>                                  | - |
| <b>C9190</b> | <i>S. lentus</i> | Red kite               | 2016 | ERY-CLI-TET-CIP <sup>b</sup> -FUS             | <i>erm(B), mph(C), tet(M)</i>                        | - |
| <b>C9192</b> | <i>S. lentus</i> | Red kite               | 2016 | ERY-CLI-TET-FUS                               | <i>erm(B), erm(43), mph(C), lnu(A), tet(K)</i>       | - |
| <b>C9195</b> | <i>S. lentus</i> | Red kite               | 2016 | PEN-FOX-ERY-CLI-CIP <sup>b</sup> -FUS         | <i>mecA, blaZ, erm(C), mph(C)</i>                    | - |
| <b>C9196</b> | <i>S. lentus</i> | Red kite               | 2016 | CLI-TET-FUS                                   | <i>lnu(A), tet(K)</i>                                | - |

|              |                      |                       |      |                                               |                                                                  |   |
|--------------|----------------------|-----------------------|------|-----------------------------------------------|------------------------------------------------------------------|---|
| <b>C9199</b> | <i>S. lentus</i>     | Red kite              | 2016 | PEN-FOX-CLI <sup>I</sup> -TET-FUS             | <i>mecA, tet(K)</i>                                              | - |
| <b>C9201</b> | <i>S. lentus</i>     | Red kite              | 2016 | ERY-CLI-FUS                                   | <i>erm(B), erm(43), mph(C)</i>                                   | - |
| <b>C9204</b> | <i>S. lentus</i>     | Red kite              | 2016 | ERY-CLI-TET                                   | <i>erm(C), tet(K)</i>                                            | - |
| <b>C9205</b> | <i>S. lentus</i>     | Red kite              | 2016 | CLI <sup>I</sup> -TET-FUS                     | <i>lnu(A), tet(K)</i>                                            | - |
| <b>C9209</b> | <i>S. lentus</i>     | Red kite              | 2015 | CLI <sup>I</sup> -TET-FUS                     | <i>lnu(A), tet(K)</i>                                            | - |
| <b>C9210</b> | <i>S. lentus</i>     | Red kite              | 2015 | PEN-FOX-ERY-CLI-TET-<br>CIP <sup>b</sup> -FUS | <i>mecA, blaZ, erm(C),<br/>erm(43), mph(C), tet(K)</i>           | - |
| <b>C9250</b> | <i>S. lentus</i>     | Cinereous vulture     | 2015 | ERY-CLI                                       | <i>erm(B), erm(43), mph(C)</i>                                   | - |
| <b>C9251</b> | <i>S. lentus</i>     | Cinereous vulture     | 2015 | ERY <sup>I</sup> -CLI <sup>I</sup>            | <i>erm(B), mph(C)</i>                                            | - |
| <b>C9254</b> | <i>S. lentus</i>     | Cinereous vulture     | 2015 | CLI-TET-FUS                                   | <i>lnu(A), tet(K)</i>                                            | - |
| <b>C9265</b> | <i>S. lentus</i>     | Bearded vulture       | 2015 | CLI-TOB-STR-TET-SXT                           | <i>lnu(A), ant(4')-Ia, str,<br/>tet(K), tet(L), tet(M), dfrK</i> | - |
| <b>C9272</b> | <i>S. lentus</i>     | Western marsh harrier | 2016 | PEN-CLI <sup>I</sup> -FUS                     | <i>lnu(A)</i>                                                    | - |
| <b>C9482</b> | <i>S. lentus</i>     | Cinereous vulture     | 2016 | FUS                                           |                                                                  | - |
| <b>C9510</b> | <i>S. lentus</i>     | Cinereous vulture     | 2016 | ERY-CLI-FUS                                   | <i>erm(B)</i>                                                    | - |
| <b>C9511</b> | <i>S. lentus</i>     | Cinereous vulture     | 2016 | CLI-FUS                                       | <i>lnu(A)</i>                                                    | - |
| <b>C9268</b> | <i>S. fleurettii</i> | Bearded vulture       | 2015 | PEN-FOX-CLI <sup>I</sup> -STR-FUS             | <i>mecA, str</i>                                                 | - |
| <b>C9485</b> | <i>S. fleurettii</i> | Cinereous vulture     | 2016 | PEN-FOX-CLI <sup>I</sup> -FUS                 | <i>mecA</i>                                                      | - |
| <b>C9486</b> | <i>S. fleurettii</i> | Cinereous vulture     | 2016 | PEN-FOX-CLI <sup>I</sup> -STR-FUS             | <i>mecA, str</i>                                                 | - |
| <b>C9492</b> | <i>S. fleurettii</i> | Cinereous vulture     | 2016 | PEN-FOX-CLI <sup>I</sup> -STR-FUS             | <i>mecA, str</i>                                                 | - |
| <b>C9495</b> | <i>S. fleurettii</i> | Cinereous vulture     | 2016 | PEN-FOX-FUS                                   | <i>mecA</i>                                                      | - |

|              |                                               |                           |      |                                   |                                                       |   |
|--------------|-----------------------------------------------|---------------------------|------|-----------------------------------|-------------------------------------------------------|---|
| <b>C9504</b> | <i>S. fleurettii</i>                          | Cinereous vulture         | 2016 | PEN-CLI <sup>I</sup> -FUS         | <i>mecA</i>                                           | - |
| <b>C9507</b> | <i>S. fleurettii</i>                          | Cinereous vulture         | 2016 | PEN-CLI-FUS                       | <i>mecA, lnu(A)</i>                                   | - |
| <b>C9168</b> | <i>S. vitulinus</i>                           | Magpie                    | 2016 | FUS                               |                                                       | - |
| <b>C9171</b> | <i>S. vitulinus</i>                           | Magpie                    | 2016 | PEN-FOX-STR-FUS                   | <i>mecA, str</i>                                      | - |
| <b>C9172</b> | <i>S. vitulinus</i>                           | Magpie                    | 2016 | CLI                               |                                                       | - |
| <b>C9273</b> | <i>S. vitulinus</i>                           | Western marsh harrier     | 2016 | CLI-FUS                           |                                                       | - |
| <b>C9463</b> | <i>S. vitulinus</i>                           | Magpie                    | 2016 | PEN-FOX-FUS                       | <i>mecA</i>                                           | - |
| <b>C9490</b> | <i>S. vitulinus</i>                           | Cinereous vulture         | 2016 | STR-GEN-TOB-FUS                   | <i>aac(6')-Ie-aph(2'')-Ia, str</i>                    | - |
| <b>C9163</b> | <i>S. epidermidis</i>                         | Magpie                    | 2015 | PEN-ERY-CLI-FUS                   | <i>blaZ, erm(C), lnu(A), fusB</i>                     | - |
| <b>C9170</b> | <i>S. epidermidis</i>                         | Magpie                    | 2016 | PEN-FOX-CLI <sup>I</sup> -FUS     | <i>mecA, lnu(A), vga(A)</i>                           | - |
| <b>C9271</b> | <i>S. epidermidis</i>                         | Bearded vulture           | 2016 | PEN-FOX-ERY-CLI <sup>I</sup> -TET | <i>mecA, blaZ, erm(C),<br/>mph(C), lnu(A), tet(K)</i> | - |
| <b>C9524</b> | <i>S. epidermidis</i>                         | Northern bald ibis        | 2016 | PEN-ERY-CLI                       | <i>blaZ, erm(C), mph(C)</i>                           | - |
| <b>C9259</b> | <i>S. kloosii</i>                             | Cinereous vulture         |      | PEN-CLI-TET-FUS                   | <i>blaZ, lnu(A), tet(K)</i>                           | - |
| <b>C9532</b> | <i>S. kloosii</i>                             | European honey<br>buzzard | 2016 | PEN-FUS                           | <i>blaZ</i>                                           | - |
| <b>C9534</b> | <i>S. kloosii</i>                             | European honey<br>buzzard | 2016 | PEN-FUS                           | <i>blaZ</i>                                           | - |
| <b>C9267</b> | <i>S. schleiferi</i> subsp. <i>schleiferi</i> | Bearded vulture           | 2015 | CLI-STR-TET                       | <i>lnu(A), str, tet(K)</i>                            | - |
| <b>C9269</b> | <i>S. schleiferi</i> subsp. <i>schleiferi</i> | Bearded vulture           | 2015 | CLI <sup>I</sup> -STR-TET         | <i>lnu(A), str, tet(K)</i>                            | - |
| <b>C9508</b> | <i>S. schleiferi</i> subsp. <i>schleiferi</i> | Cinereous vulture         |      | PEN-STR-TET                       | <i>blaZ, str, tet(K)</i>                              | - |

|              |                         |                        |      |                     |                                       |   |
|--------------|-------------------------|------------------------|------|---------------------|---------------------------------------|---|
| <b>C9255</b> | <i>S. xyloso</i>        | Cinereous vulture      |      | PEN                 | <i>blaZ</i>                           | - |
| <b>C9275</b> | <i>S. xyloso</i>        | Western marsh harrier  | 2016 | PEN-ERY-CLI-TET-FUS | <i>erm(B), mph(C), lnu(A), tet(K)</i> | - |
| <b>C9500</b> | <i>S. xyloso</i>        | Cinereous vulture      | 2016 | PEN-CLI-STR-CIP-FUS | <i>str</i>                            | - |
| <b>C9496</b> | <i>S. saprophyticus</i> | Cinereous vulture      | 2016 | PEN                 | <i>blaZ, fusD</i>                     | - |
| <b>C9531</b> | <i>S. saprophyticus</i> | European honey buzzard | 2016 | GEN-TOB-FUS         | <i>aac(6')-Ie-aph(2'')-Ia, fusD</i>   | - |
| <b>C9164</b> | <i>S. capitis</i>       | Magpie                 | 2015 | Susceptible         |                                       | - |
| <b>C9469</b> | <i>S. succinus</i>      | Magpie                 | 2016 | PEN                 | <i>blaZ</i>                           | - |

<sup>a</sup>PEN, penicillin; FOX, ceftioxin; ERY, erythromycin; CLI, clindamycin; GEN, gentamicin; TOB, tobramycin; STR, streptomycin; TET, tetracycline; CIP, ciprofloxacin; CHL, chloramphenicol; FUS, fusidic acid; SXT, trimethoprim-sulfamethoxazole; I, intermediate resistance; In, inducible resistance.

<sup>b</sup>These isolates showed amino acid changes in GyrA (S84L) and GrlA proteins (D84E and M89L).

**Table S3.** SCC*mec*-typing of the 47 CoNS isolates from wild birds that carried the *mecA* gene.

| <b>Isolate</b>         | <b><i>ccr</i></b>               | <b><i>mec</i> complex</b> | <b>SCC<i>mec</i></b> |
|------------------------|---------------------------------|---------------------------|----------------------|
| <i>S. sciuri</i> C9166 | -                               | -                         | -                    |
| <i>S. sciuri</i> C9186 | -                               | -                         | -                    |
| <i>S. sciuri</i> C9198 | -                               | A                         | -                    |
| <i>S. sciuri</i> C9207 | <i>ccrA3-ccrB3</i>              | A                         | III                  |
| <i>S. sciuri</i> C9212 | <i>ccrA2-ccrB2, ccrA3-ccrB3</i> | A                         | -                    |
| <i>S. sciuri</i> C9215 | <i>ccrA3-ccrB3</i>              | A                         | III                  |
| <i>S. sciuri</i> C9217 | -                               | -                         | -                    |
| <i>S. sciuri</i> C9220 | -                               | -                         | -                    |
| <i>S. sciuri</i> C9222 | <i>ccrA2-ccrB2, ccrA3-ccrB3</i> | A                         | -                    |
| <i>S. sciuri</i> C9227 | -                               | -                         | -                    |
| <i>S. sciuri</i> C9233 | <i>ccrA3-ccrB3</i>              | A                         | III                  |
| <i>S. sciuri</i> C9238 | -                               | -                         | -                    |
| <i>S. sciuri</i> C9240 | -                               | -                         | -                    |
| <i>S. sciuri</i> C9244 | <i>ccrA3-ccrB3</i>              | A                         | III                  |
| <i>S. sciuri</i> C9249 | -                               | -                         | -                    |
| <i>S. sciuri</i> C9260 | -                               | -                         | -                    |
| <i>S. sciuri</i> C9263 | <i>ccrA3-ccrB3</i>              | A                         | III                  |
| <i>S. sciuri</i> C9270 | <i>ccrA3-ccrB3</i>              | A                         | III                  |
| <i>S. sciuri</i> C9462 | -                               | -                         | -                    |

|                             |                                 |   |     |
|-----------------------------|---------------------------------|---|-----|
| <i>S. sciuri</i> C9476      | <i>ccrA1-ccrB1, ccrA3-ccrB3</i> | - |     |
| <i>S. sciuri</i> C9477      | <i>ccrA1-ccrB1, ccrA3-ccrB3</i> | - |     |
| <i>S. sciuri</i> C9506      | -                               | - |     |
| <i>S. sciuri</i> C9513*     | -                               | - | -   |
| <i>S. sciuri</i> C9515      | <i>ccrA3-ccrB3</i>              | A | III |
| <i>S. sciuri</i> C9517*     | -                               | - | -   |
| <i>S. sciuri</i> C9519      | -                               | - |     |
| <i>S. sciuri</i> C9520      | <i>ccrA3-ccrB3</i>              | A | III |
| <i>S. sciuri</i> C9521      | -                               | - |     |
| <i>S. sciuri</i> C9522      | <i>ccrA3-ccrB3</i>              | A | III |
| <i>S. sciuri</i> C9525      | <i>ccrA3-ccrB3</i>              | A | III |
| <i>S. sciuri</i> C9528*     | -                               | - |     |
| <i>S. lentus</i> C9180      | <i>ccrC</i>                     | - |     |
| <i>S. lentus</i> C9182      | <i>ccrA3-ccrB3</i>              | A | III |
| <i>S. lentus</i> C9195      | -                               | - |     |
| <i>S. lentus</i> C9199      | <i>ccrA3-ccrB3</i>              | A | III |
| <i>S. lentus</i> C9210      | -                               | A |     |
| <i>S. epidermidis</i> C9170 | <i>ccrC</i>                     | - | -   |
| <i>S. epidermidis</i> C9271 | <i>ccrA2-ccrB2</i>              | B | IV  |
| <i>S. vitulinus</i> C9171   | -                               | - | -   |
| <i>S. vitulinus</i> C9463   | -                               | - | -   |

|                             |   |   |   |
|-----------------------------|---|---|---|
| <i>S. fleurettii</i> C9268  | - | - | - |
| <i>S. fleurettii</i> C9485  | - | A | - |
| <i>S. fleurettii</i> C9486  | - | A | - |
| <i>S. fleurettii</i> C9492  | - | A | - |
| <i>S. fleurettii</i> C9495  | - | A | - |
| <i>S. fleurettii</i> C9504* | - | A | - |
| <i>S. fleurettii</i> C9507* | - | A | - |

Isolates with an asterisk are those that did not exhibit a methicillin resistance phenotype.

## References

1. Wang, Y.; Lv, Y.; Cai, J.; Schwarz, S.; Cui, L.; Hu, Z.; Zhang, R.; Li, J.; Zhao, Q.; He, T.; et al. A novel gene, *optrA*, that confers transferable resistance to oxazolidinones and phenicols and its presence in *Enterococcus faecalis* and *Enterococcus faecium* of human and animal origin. *J. Antimicrob. Chemother.* **2015**, *70*, 2182–2190, doi:10.1093/jac/dkv116.
2. Ruiz-Ripa, L.; Feßler, A.T.; Hanke, D.; Sanz, S.; Olarte, C.; Mama, O.M.; Eichhorn, I.; Schwarz, S.; Torres, C. Coagulase-negative staphylococci carrying *cfr* and PVL genes, and MRSA/MSSA-CC398 in the swine farm environment. *Vet. Microbiol.* **2020**, *243*, 108631, doi:10.1016/j.vetmic.2020.108631.
3. Kehrenberg, C.; Schwarz, S. Distribution of florfenicol resistance genes *fexA* and *cfr* among chloramphenicol-resistant *Staphylococcus* isolates. *Antimicrob. Agents Chemother.* **2006**, *50*, 1156–1163, doi:10.1128/AAC.50.4.1156-1163.2006.
4. Lee, S.M.; Huh, H.J.; Song, D.J.; Shim, H.J.; Park, K.S.; Kang, C.I.; Ki, C.S.; Lee, N.Y. Resistance mechanisms of linezolid-nonsusceptible enterococci in Korea: Low rate of 23s rRNA mutations in *Enterococcus faecium*. *J. Med. Microbiol.* **2017**, *66*, 1730–1735, doi:10.1099/jmm.0.000637.
5. Ruiz-Ripa, L.; Feßler, A.T.; Hanke, D.; Eichhorn, I.; Azcona-Gutiérrez, M.; Pérez-Moreno, M.O.; Seral, C.; Aspiroz, C.; Alonso, C.A.; Torres, L.; et al. Mechanisms of Linezolid Resistance Among Enterococci of Clinical Origin in Spain — Detection of *optrA* - and *cfr*(D)-Carrying *E. faecalis*. **2020**, doi:10.3390/microorganisms8081155.
6. Kehrenberg, C.; Schwarz, S. Florfenicol-chloramphenicol exporter gene *fexA* is part of the novel transposon Tn558. *Antimicrob. Agents Chemother.* **2005**, *49*, 813–815, doi:10.1128/AAC.49.2.813-815.2005.
7. Liu, H.; Wang, Y.; Wu, C.; Schwarz, S.; Shen, Z.; Jeon, B.; Ding, S.; Zhang, Q.; Shen, J. A novel phenicol exporter gene, *fexB*, found in enterococci of animal origin. *J. Antimicrob. Chemother.* **2012**, *67*, 322–325, doi:10.1093/jac/dkr481.
8. Schnellmann, C.; Gerber, V.; Rossano, A.; Jaquier, V.; Panchaud, Y.; Doherr, M.G.; Thomann, A.; Straub, R.; Perreten, V. Presence of new *mecA* and *mph*(C) variants conferring antibiotic resistance in *Staphylococcus* spp. isolated from the skin of horses before and after clinic admission. *J. Clin. Microbiol.* **2006**, *44*, 4444–4454, doi:10.1128/JCM.00868-06.
9. Poulsen, A.B.; Skov, R.; Pallesen, L. V. Detection of methicillin resistance in coagulase-negative staphylococci and in staphylococci directly from simulated blood cultures using the EVIGENE MRSA Detection Kit. *J. Antimicrob. Chemother.* **2003**, *51*, 419–421, doi:10.1093/jac/dkg084.
10. Becker, K.; van Alen, S.; Idelevich, E.A.; Schleimer, N.; Seggewiß, J.; Mellmann, A.; Kaspar, U.; Peters, G. Plasmid-encoded transferable *mecB*-mediated methicillin resistance in *Staphylococcus aureus*. *Emerg. Infect. Dis.* **2018**, *24*, 242–248, doi:10.3201/eid2402.171074.
11. Cuny, C.; Layer, F.; Strommenger, B.; Witte, W. Rare occurrence of methicillin-resistant *Staphylococcus aureus* CC130 with a novel

- mecA* homologue in humans in Germany. *PLoS One* **2011**, *6*, doi:10.1371/journal.pone.0024360.
12. Sutcliffe, J.; Grebe, T.; Tait-Kamradt, A.; Wondrack, L. Detection of erythromycin-resistant determinants by PCR. *Antimicrob. Agents Chemother.* **1996**, *40*, 2562–2566, doi:10.1128/aac.40.11.2562.
  13. Gómez-Sanz, E.; Torres, C.; Lozano, C.; Fernández-Pérez, R.; Aspiroz, C.; Ruiz-Larrea, F.; Zarazaga, M. Detection, molecular characterization, and clonal diversity of methicillin-resistant *Staphylococcus aureus* CC398 and CC97 in Spanish slaughter pigs of different age groups. *Foodborne Pathog. Dis.* **2010**, *7*, 1269–1277, doi:10.1089/fpd.2010.0610.
  14. Schwendener, S.; Perreten, V. New MLS B resistance gene *erm(43)* in *Staphylococcus lentus*. *Antimicrob. Agents Chemother.* **2012**, *56*, 4746–4752, doi:10.1128/AAC.00627-12.
  15. Wondrack, L.; Massa, M.; Yang, B. V.; Sutcliffe, J. Clinical strain of *Staphylococcus aureus* inactivates and causes efflux of macrolides. *Antimicrob. Agents Chemother.* **1996**, *40*, 992–998, doi:10.1128/aac.40.4.992.
  16. Hot, C.; Berthet, N.; Chesneau, O. Characterization of *sal(A)*, a Novel Gene Responsible for Lincosamide and Streptogramin a resistance in *Staphylococcus sciuri*. *Antimicrob. Agents Chemother.* **2014**, *58*, 3335–3341, doi:10.1128/AAC.02797-13.
  17. Lina, G.; Piémont, Y.; Godail-Gamot, F.; Bes, M.; Peter, M.O.; Gauduchon, V.; Vandenesch, F.; Etienne, J. Involvement of Pantone-Valentine leukocidin-producing *Staphylococcus aureus* in primary skin infections and pneumonia. *Clin. Infect. Dis.* **1999**, *29*, 1128–1132, doi:10.1086/313461.
  18. Bozdogan, B.; Berrezouga, L.; Kou, M.S.; Yurek, D.A.; Farley, K.A.; Stockman, B.J.; Leclercq, R. A new resistance gene, *linB*, conferring resistance to lincosamides by nucleotidylation in *Enterococcus faecium* HM1025. *Antimicrob. Agents Chemother.* **1999**, *43*, 925–929, doi:10.1128/aac.43.4.925.
  19. Lozano, C.; Aspiroz, C.; Rezusta, A.; Gómez-Sanz, E.; Simon, C.; Gómez, P.; Ortega, C.; Revillo, M.J.; Zarazaga, M.; Torres, C. Identification of novel *vga(A)*-carrying plasmids and a Tn5406-like transposon in methicillin-resistant *Staphylococcus aureus* and *Staphylococcus epidermidis* of human and animal origin. *Int. J. Antimicrob. Agents* **2012**, *40*, 306–312, doi:10.1016/j.ijantimicag.2012.06.009.
  20. van de Klundert, J.; Vliegenthart, J. PCR detection of genes coding for aminoglycoside- modifying enzymes. In *Diagnostic Molecular Microbiology. Principles and Applications*; 1993; pp. 547–552.
  21. Clark, N.C.; Olsvik, Ø.; Swenson, J.M.; Spiegel, C.A.; Tenover, F.C. Detection of a streptomycin/spectinomycin adenylyltransferase gene (*aadA*) in *Enterococcus faecalis*. *Antimicrob. Agents Chemother.* **1999**, *43*, 157–160, doi:10.1128/aac.43.1.157.
  22. Aarestrup, F.M.; Agero, Y.; Gerner-Smidt, P.; Madsen, M.; Jensen, L.B. Comparison of antimicrobial resistance phenotypes and resistance genes in *Enterococcus faecalis* and *Enterococcus faecium* from humans in the community, broilers, and pigs in Denmark. *Diagn. Microbiol. Infect. Dis.* **2000**, *37*, 127–137, doi:10.1016/S0732-8893(00)00130-9.
  23. Mclaws, F.; Chopra, I.; O'Neill, A.J. High prevalence of resistance to fusidic acid in clinical isolates of *Staphylococcus epidermidis*. *J.*

- Antimicrob. Chemother.* **2008**, *61*, 1040–1043, doi:10.1093/jac/dkn071.
24. Chen, H.J.; Hung, W.C.; Tseng, S.P.; Tsai, J.C.; Hsueh, P.R.; Teng, L.J. Fusidic acid resistance determinants in *Staphylococcus aureus* clinical isolates. *Antimicrob. Agents Chemother.* **2010**, *54*, 4985–4991, doi:10.1128/AAC.00523-10.
  25. Intorre, L.; Vanni, M.; Di Bello, D.; Pretti, C.; Meucci, V.; Tognetti, R.; Soldani, G.; Cardini, G.; Jousson, O. Antimicrobial susceptibility and mechanism of resistance to fluoroquinolones in *Staphylococcus intermedius* and *Staphylococcus schleiferi*. *J. Vet. Pharmacol. Ther.* **2007**, *30*, 464–469, doi:10.1111/j.1365-2885.2007.00896.x.
  26. Kondo, Y.; Ito, T.; Ma, X.X.; Watanabe, S.; Kreiswirth, B.N.; Etienne, J.; Hiramatsu, K. Combination of multiplex PCRs for staphylococcal cassette chromosome *mec* type assignment: Rapid identification system for *mec*, *ccr*, and major differences in junkyard regions. *Antimicrob. Agents Chemother.* **2007**, *51*, 264–274, doi:10.1128/AAC.00165-06.
  27. Witte, W.; Strommenger, B.; Stanek, C.; Cuny, C. Methicillin-resistant *Staphylococcus aureus* ST398 in humans and animals, central Europe. *Emerg. Infect. Dis.* **2007**, *13*, 255–258, doi:10.3201/eid1302.060924.
  28. Jarraud, S.; Mougel, C.; Thioulouse, J.; Lina, G.; Meugnier, H.; Forey, F.; Nesme, X.; Etienne, J.; Vandenesch, F. Relationships between *Staphylococcus aureus* genetic background, virulence factors, *agr* groups (alleles), and human disease. *Infect. Immun.* **2002**, *70*, 631–641, doi:10.1128/IAI.70.2.631.
  29. Yamaguchi, T.; Nishifuji, K.; Sasaki, M.; Fudaba, Y.; Aepfelbacher Amagai, M.; Takata, T.; Ohara, M.; Komatsuzawa, H.; Aepfelbacher Amagai, M.; Yamaguchi, T.; et al. Identification of the *Staphylococcus aureus etd* pathogenicity island which encodes a novel exfoliative toxin, ETD, and EDIN-B. *Infect. Immun.* **2002**, *70*, 5835–5845, doi:10.1128/IAI.70.10.5835.
  30. Van Wamel, W.J.B.; Rooijackers, S.H.M.; Kessel, K.P.M. Van; Strijp, J. a G. Van; Ruyken, M. The Innate Immune Modulators Staphylococcal Complement Inhibitor and Chemotaxis Inhibitory Protein of *Staphylococcus aureus* are located on beta-hemolysin-converting bacteriophages. *J. Bacteriol.* **2006**, *188*, 1310–1315, doi:10.1128/JB.188.4.1310.
